# Supplementary material for: TRIM14 promotes endothelial activation via activating NF-κB signaling pathway
Source: PubMed Central journal article supplement — J Mol Cell Biol. 2019 May 9;12(3):176–89. doi: 10.1093/jmcb/mjz040 (PMC7181718; doi:10.1093/jmcb/mjz040), 2019-05-09
Supplement: jmcb-2018-0356_r3_supplementary_information_mjz040.pdf [file jmcb-2018-0356_r3_supplementary_information_mjz040.pdf]

Supplementary Figure 1, Huang et al.

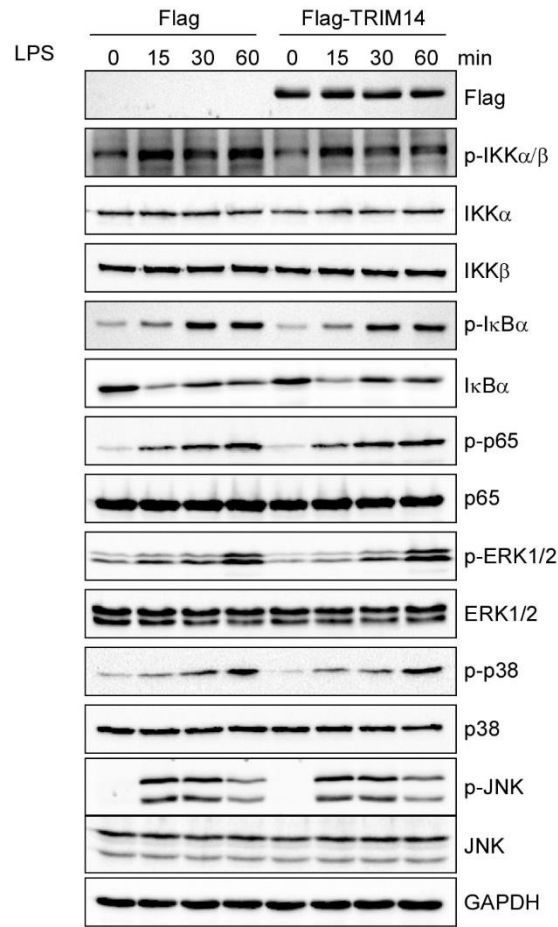

**Fig. S1. Overexpression of TRIM14 does not affect LPS-induced NF- $\kappa$ B signaling in Raw264.7 cells.** Raw264.7 cells were transiently transfected with Flag-TRIM14 or Flag vector (control) for 24 h and then stimulated with 1  $\mu$ g/mL LPS for 0, 15, 30, and 60 min. Cell lysates were harvested for detection of the phosphorylated protein levels as indicated by Western blot.

**Supplementary Table 1: Sequences of QPCR primers used in this study.**

| <b>Primer Name</b>   | <b>Forward Sequences (5'-3')</b> | <b>Reverse Sequences (5'-3')</b> |
|----------------------|----------------------------------|----------------------------------|
| Mouse TRIM14         | GACGGGGCGTATGGCTG                | AGTCCTGGATTAGCTTCTGCAC           |
| Human TRIM14         | GAGGTCGGAGCTTGTGCGAG             | TTCTTGCTGAGTTTCTGCAC             |
| Human VCAM-1         | TGTTTGCAGCTTCTCAAGCTTTT          | GATGTGGTCCCCTCATTCGT             |
| Human ICAM-1         | AGCTTCGTGTCTGTATGGC              | TTTTCTGGCCACGTCCAGTT             |
| Human E-Selectin     | GGCAGTTCCGGGAAAGATCA             | GTGGGAGCTTACAGGTAGG              |
| Human VE-Cadherin    | ATGAGATCGTGGTGGAAAGCG            | TGTGTACTTGGTCTGGGTGAAG           |
| Human TNF- $\alpha$  | TCTCGCACCCCGAGTGA                | GGAGCTGCCCTCAGCTT                |
| Human MCP1           | CAGCCAGATGCAATCAATGCC            | TGGAATCCTGAACCCACTTCT            |
| Human IL-8           | TCTGTGTGAAGGTGCAGTTTTG           | TTTCTGTGTTGGCGCAGTGT             |
| Human CXCL1          | CTGGCTTAGAACAAAGGGGCT            | TAAAGGTAGCCCTTGTTTCCCC           |
| Human CCL-5          | CGTGCCACATCAAGGAGTA              | CTTGACCTGTGGACGACTGC             |
| Human $\beta$ -actin | ACGTTGCTATCCAGGCTGTG             | GAGGGCATACCCCTCGTAGA             |
| Mouse $\beta$ -actin | GATATCGCTGCGCTGGTCG              | CATTCCCACCATCACACCCT             |
| Human 18S RNA        | GCTCGCTCCTCTCCTACTTG             | ATCTAGAGTCACCAAGCCGC             |
| ChIP 1               | AATTGAAACCGTGCCTGAA              | TCCATTGCATATTCCACATCTA           |
| ChIP 2               | TGAAATTCCTTGTACCTTTGTG           | TTTTCCAGCTTGGTGTCTGA             |
